# Supplementary material for: Cobalt disulfide supported on porous carbon foam as a high performance hydrogen evolution reaction catalyst
Source: Royal Society of Chemistry journal article supplement (doi:10.1039/d1nj03487a), 2021-01-01
Supplement: d1nj03487a1.pdf [file d1nj03487a1.pdf]

## Supporting Information

### **Cobalt disulfide supported on porous carbon foam for high performance hydrogen evolution reaction**

Yujin Su<sup>a</sup>, Jinxin Liu<sup>a</sup>, Jinling Zhong<sup>b</sup>, Cuicui Zhang<sup>c</sup>, Qing Li<sup>a\*</sup>, Aijun Li<sup>a</sup>, Yantao Zhang<sup>a</sup>, Haichao Jiang<sup>a</sup>, Shanlin Qiao<sup>a</sup>

<sup>a</sup> *College of Chemistry and Pharmaceutical Engineering, Hebei University of Science and Technology, Shijiazhuang 050018, China*

<sup>b</sup> *Key Laboratory of Power Electronics for Energy Conservation and Motor Drive of Hebei Province, Department of Electrical Engineering, Yanshan University, Qinhuangdao 066004, China*

<sup>c</sup> *Shijiazhuang People's Medical College, Shijiazhuang 050000, China*

\*E-mail: [iccaslq@hebust.edu.cn](mailto:iccaslq@hebust.edu.cn)

## Contents

**Figure S1.** SEM images of pure CoS<sub>2</sub>.

**Figure S2.** TEM images of CoS<sub>2</sub>-CF-4.

**Figure S3.** SEM image of CoS<sub>2</sub>-CF-4 (a). Mapping images of (b) C, (c) Co, (d) N, (e) O, (f) P, and (g) S for CoS<sub>2</sub>-CF-4.

**Figure S4.** The N<sub>2</sub> adsorption/desorption isotherms of CoS<sub>2</sub>-CF-X (X=1, 2, 3, 4) composites (a), (c), (e) and (g). The calculated pore parameters of CoS<sub>2</sub>-CF-X (X=1, 2, 3, 4) composites (b), (d), (f) and (h).

**Figure S5.** The N<sub>2</sub> adsorption/desorption curves (a) and pore size distribution with CF-X (X=1, 2, 3, 4) composites (b).

**Figure S6.** The N<sub>2</sub> adsorption/desorption isotherms of CF-X (X=1, 2, 3, 4) composites (a), (c), (e) and (g). The calculated pore parameters of CF-X (X=1, 2, 3, 4) composites (b), (d), (f) and (h).

**Figure S7.** The polarization curves of CoS<sub>2</sub> (a) and its corresponding Tafel plot (b), the charge transport resistance of CoS<sub>2</sub> (c).

**Figure S8.** The polarization curves of CoS<sub>2</sub>-CF-5 (a) and its corresponding Tafel plots (b) the charge transport resistance of CoS<sub>2</sub>-CF-5 (c).

**Figure S9.** The LSV curves of CF-X (X=1, 2, 3, 4, 5), the corresponding Tafel plots (b) and charge transport resistance (c).

**Figure S10.** SEM images of CoS<sub>2</sub>-CF-4 composite after 4000 linear cycles.

**Figure S11.** Chronoamperometry test of CoS<sub>2</sub>-CF-4.

**Figure S12.** The stability of carbon rod electrode instead of platinum plate.

**Table S1.** Elemental analysis of CoS<sub>2</sub>-CF-4 composite.

**Table S2.** XPS spectra fitting result of CoS<sub>2</sub>-CF-4 composite.

**Table S3.** The mechanism process in the electrochemical hydrogen evolution reaction (HER).

**Table S3.** HER activity of CoS<sub>2</sub>-CF-X and CF-X composite.

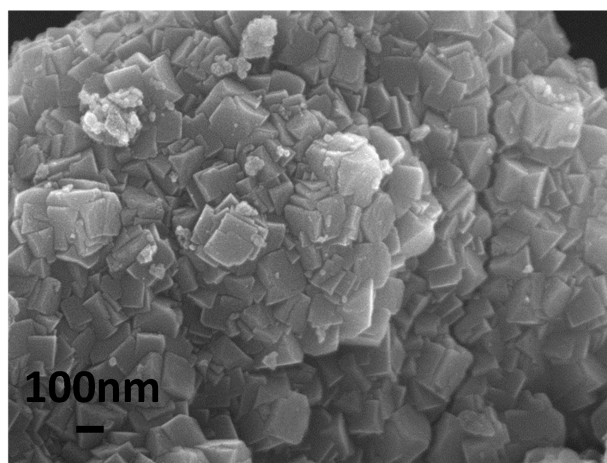

**Figure S1.** SEM images of pure CoS<sub>2</sub>.

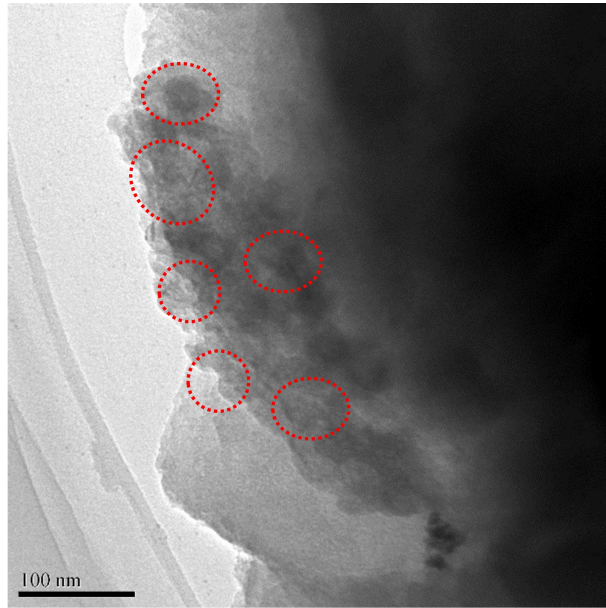

**Figure S2.** TEM images of CoS<sub>2</sub>-CF-4. The red dotted circles are the CoS<sub>2</sub> loaded on the surface of carbon foam .

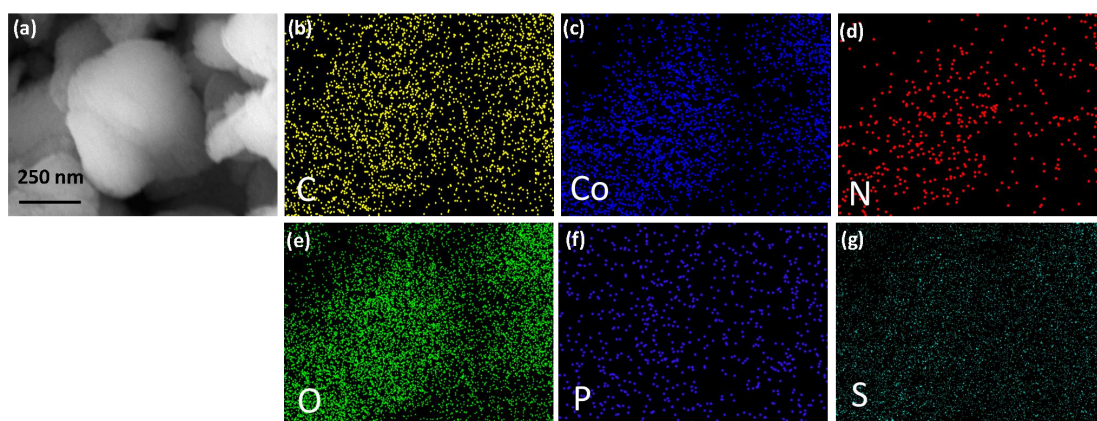

**Figure S3.** SEM image of  $\text{CoS}_2\text{-CF-4}$  (a). Mapping images of (b) C, (c) Co, (d) N, (e) O, (f) P, and (g) S for  $\text{CoS}_2\text{-CF-4}$ .

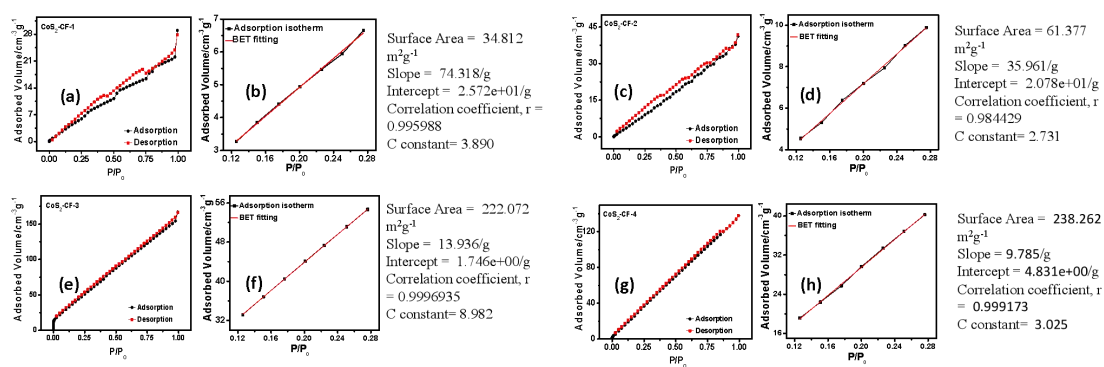

**Figure S4.** The  $N_2$  adsorption/desorption isotherms of  $CoS_2-CF-X$  (X=1, 2, 3, 4) composites (a), (c), (e) and (g). The calculated pore parameters of  $CoS_2-CF-X$  (X=1, 2, 3, 4) composites(b), (d), (f) and (h).

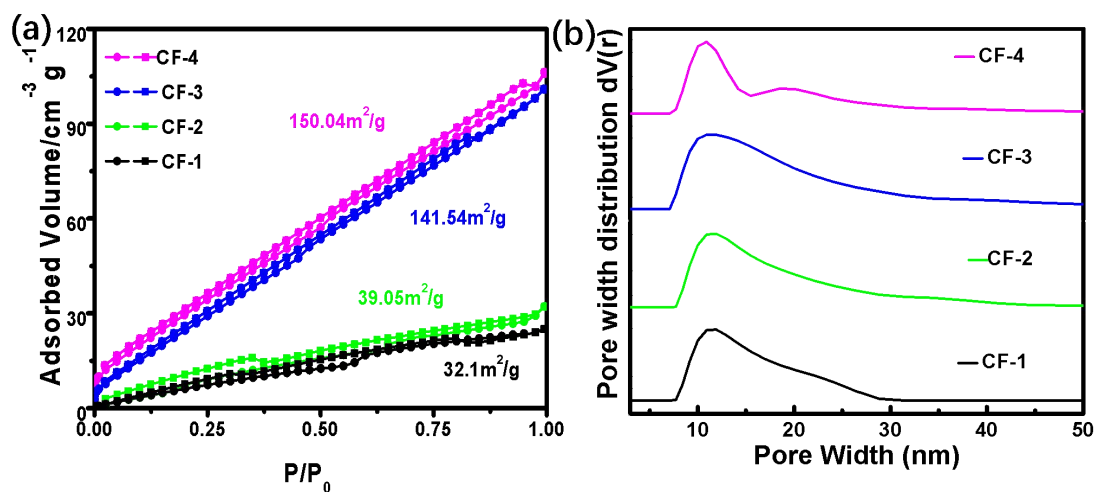

**Figure S5.** The  $N_2$  adsorption/desorption curves (a) and pore size distribution with CF-X (X=1, 2, 3, 4) composites (b).

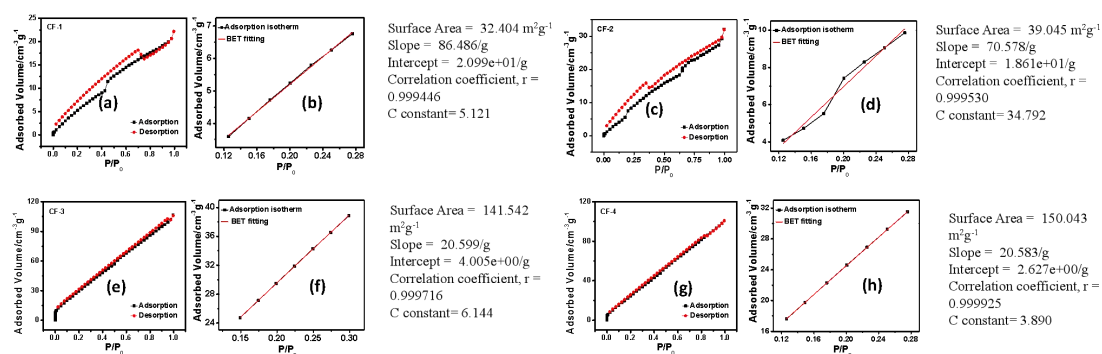

**Figure S6.** The  $N_2$  adsorption/desorption isotherms of CF-X (X=1, 2, 3, 4) composites (a), (c), (e) and (g). The calculated pore parameters of CF-X (X=1, 2, 3, 4) composites (b), (d), (f) and (h).



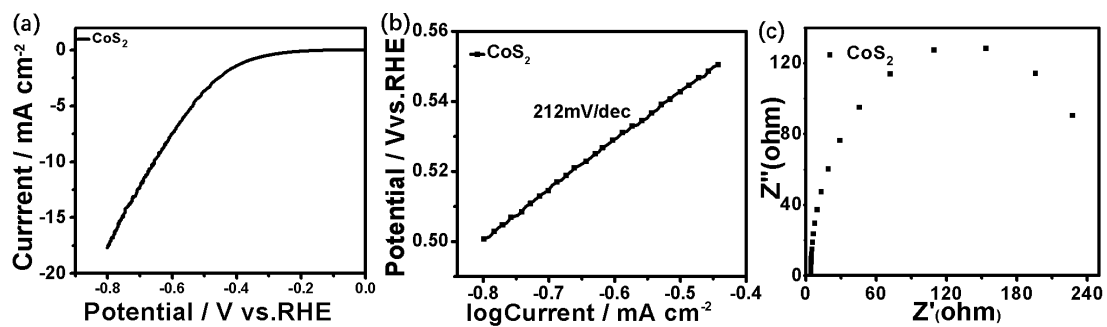

**Figure S7.** The polarization curves of CoS<sub>2</sub> (a) and its corresponding Tafel polts (b), the charge transport resistance of CoS<sub>2</sub> (c).

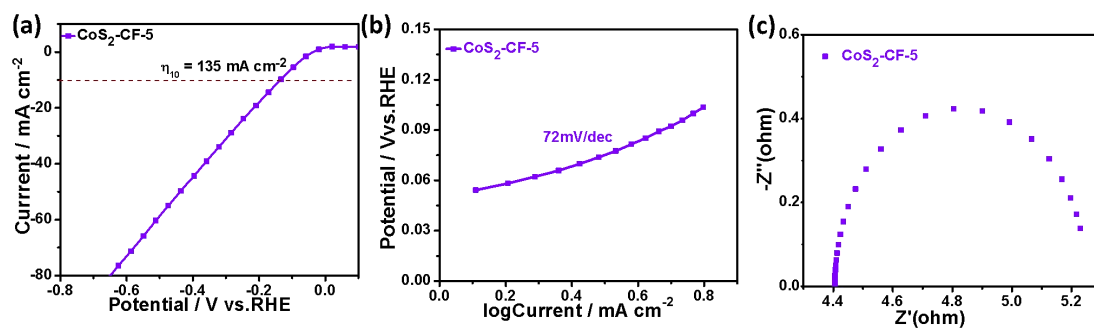

**Figure S8.** The polarization curves of CoS<sub>2</sub>-CF-5 (a) and its corresponding Tafel plots (b) the charge transport resistance of CoS<sub>2</sub>-CF-5 (c).

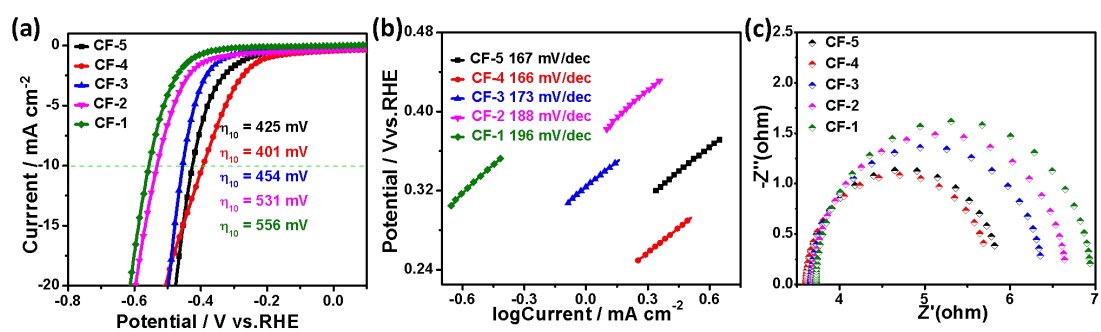

**Figure S9.** The LSV curves of CF-X (X=1, 2, 3, 4, 5), the corresponding Tafel plots (b) and charge transport resistance (c).

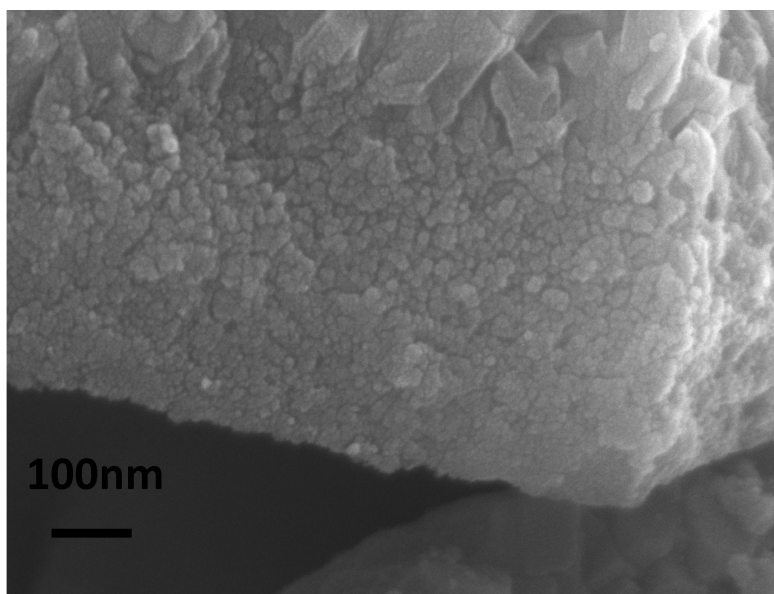

**Figure S10.** SEM images of CoS<sub>2</sub>-CF<sub>4</sub> composite after 4000 linear cycles.

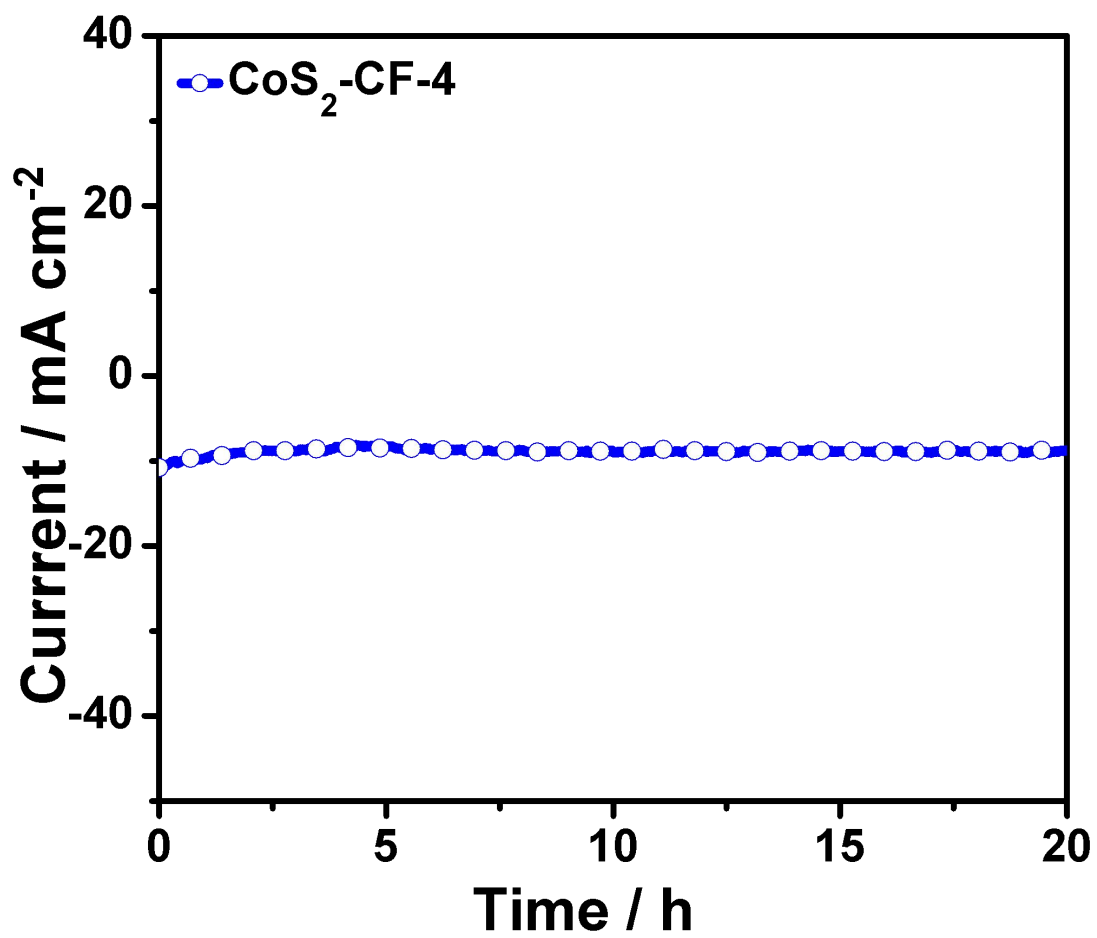

Figure S11. Chronoamperometry test of CoS<sub>2</sub>-CF-4.

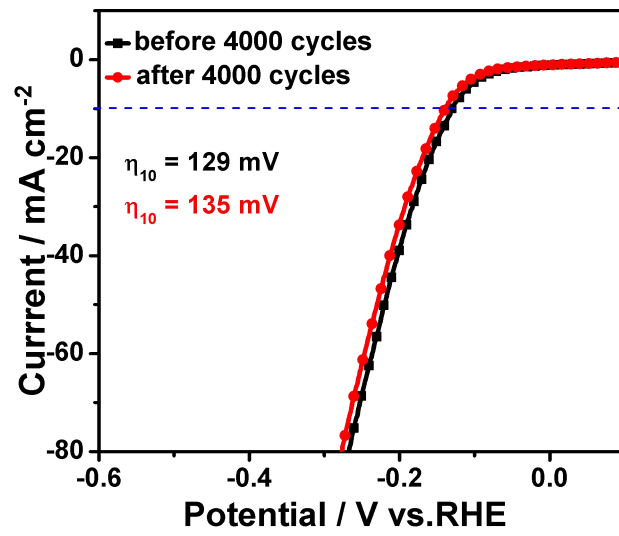

**Figure S12.** The stability of carbon rod electrode instead of platinum plate.



**Table S1.** Elemental analysis of CoS<sub>2</sub>-CF-4 composite.

| <b>Element</b> | <b>NetCounts</b> | <b>Weight %</b> | <b>Atom %</b> |
|----------------|------------------|-----------------|---------------|
| C K            | 2639             | 12.79           | 22.38         |
| N K            | 256              | 2.30            | 3.45          |
| O K            | 9284             | 38.81           | 50.98         |
| P K            | 85               | 0.17            | 0.12          |
| S K            | 10248            | 22.41           | 14.69         |
| Co K           | 2684             | 23.52           | 8.39          |
|                |                  | 100             | 100           |



**Table S2.** XPS spectra fitting result of CoS<sub>2</sub>-CF-4 composite.

| <b>C 1s</b>         |              |          |       |
|---------------------|--------------|----------|-------|
| Peak Label          | Position(eV) | FWHM(eV) | Area  |
| C-C/C=C             | 284.58       | 0.64     | 25261 |
| C-S                 | 284.94       | 0.64     | 14695 |
| C-O/C-N             | 285.43       | 1.2      | 22424 |
| <b>N 1s</b>         |              |          |       |
| Peak Label          | Position(eV) | FWHM(eV) | Area  |
| Oxidized N          | 402.22       | 1.59     | 5140  |
| Graphitic N         | 400.64       | 1.16     | 606   |
| <b>S 2p</b>         |              |          |       |
| Peak Label          | Position(eV) | FWHM(eV) | Area  |
| S-O                 | 169.4        | 1.46     | 16268 |
| S-2p <sub>1/2</sub> | 163.88       | 1.14     | 1112  |
| S-2p <sub>3/2</sub> | 163.06       | 1.18     | 675   |
| <b>Co 2p</b>        |              |          |       |
| Peak Label          | Position(eV) | FWHM(eV) | Area  |
| satelite            | 804.35       | 4.1      | 8148  |
| Co <sup>2+</sup>    | 782.43       | 2.5      | 19669 |
| Co <sup>2+</sup>    | 798.68       | 2.43     | 9317  |
| Co <sup>2+</sup>    | 785.36       | 3.44     | 11178 |
| <b>O 1s</b>         |              |          |       |
| Peak Label          | Position(eV) | FWHM(eV) | Area  |
| C-OH                | 533.38       | 1.17     | 36230 |
| C-O/ O-C-N          | 532.44       | 0.81     | 45410 |
| Co-O                | 531.81       | 0.52     | 14121 |
| <b>P 2p</b>         |              |          |       |
| Peak Label          | Position(eV) | FWHM(eV) | Area  |
| Oxidized-P          | 135.13       | 1.59     | 609   |
| Graphitic N         | 134.09       | 2.03     | 403   |

FWHM: full width half maximum.

Atomic percent of CoS<sub>2</sub>-CF-4 composite with XPS measurements.

| Material | C1s   | N1s  | S2p  | Co2p | O1s   | P2p  |
|----------|-------|------|------|------|-------|------|
| Atomic % | 76.69 | 2.51 | 3.83 | 0.38 | 16.36 | 0.58 |

Through XPS measurements, the atomic percent of C could be obtained of 76.69 %, which was calculated to the mass content of 66.92 wt %. Besides, we calculated the S

of 8.91 wt % and Co of 1.63 wt % through the XPS analysis. The mass percentage of N was 2.19 wt%.

**Table S3.** The mechanism process in the electrochemical hydrogen evolution reaction (HER) .

| Step           | Reaction                                                                |
|----------------|-------------------------------------------------------------------------|
| Volmer step    | $\text{H}^+ + \text{e}^- \rightarrow \text{H}_{\text{ad}}$              |
| Heyrovsky step | $\text{H}_{\text{ad}} + \text{H}^+ + \text{e}^- \rightarrow \text{H}_2$ |
| Tafel step     | $2\text{H}_{\text{ad}} \rightarrow \text{H}_2$                          |

**Table S4.** HER activity of CoS<sub>2</sub>- CF- X and CF-X composite

| Catalyst               | Current Density<br>(j, mA·cm <sup>-2</sup> ) | Overpotential at<br>the corresponding j(mV) | Tafel slope<br>(mV·dec <sup>-1</sup> ) |
|------------------------|----------------------------------------------|---------------------------------------------|----------------------------------------|
| CoS <sub>2</sub> -CF-1 | 10                                           | 273                                         | 93                                     |
| CoS <sub>2</sub> -CF-2 | 10                                           | 250                                         | 92                                     |
| CoS <sub>2</sub> -CF-3 | 10                                           | 157                                         | 82                                     |
| CoS <sub>2</sub> -CF-4 | 10                                           | 121                                         | 68                                     |
| CoS <sub>2</sub> -CF-5 | 10                                           | 135                                         | 72                                     |
| CF-1                   | 10                                           | 556                                         | 196                                    |
| CF-2                   | 10                                           | 531                                         | 188                                    |
| CF-3                   | 10                                           | 454                                         | 173                                    |
| CF-4                   | 10                                           | 401                                         | 166                                    |
| CF-5                   | 10                                           | 425                                         | 167                                    |
